# Supplementary material for: Enhanced cycling stability of high-voltage lithium metal batteries with a trifunctional electrolyte additive
Source: Royal Society of Chemistry journal article supplement (doi:10.1039/d0ta07438a), 2020-01-01
Supplement: d0ta07438a1.pdf [file d0ta07438a1.pdf]

Supporting information for

**Enhanced Cycling Stability of High-Voltage Lithium Metal Battery with  
Trifunctional Electrolyte Additive**

Huiyang Chen,<sup>a,‡</sup> Jiawei Chen,<sup>a,‡</sup> Wenguang Zhang,<sup>a</sup> Qiming Xie,<sup>a</sup> Yanxia Che,<sup>a</sup> Huirong Wang,<sup>a</sup>

Lidan Xing<sup>a,\*</sup>, Kang Xu<sup>b</sup> and Weishan Li<sup>a</sup>

a. China National and Local Joint Engineering Research Center of MPES in High Energy and Safety

LIBs, Engineering Research Center of MTEES (Ministry of Education), Research Center of BMET

(Guangdong Province), School of Chemistry, South China Normal University, Guangzhou 510006,

China

b. Electrochemistry Branch, Sensor and Electron Devices Directorate, Power and Energy Division, U.S.

Army Research Laboratory, Adelphi, Maryland 20783, United States of America

‡ H. C. and J. C. contributed equally to this work

---

\* Corresponding author's email: xingld@scnu.edu.cn (L. Xing).

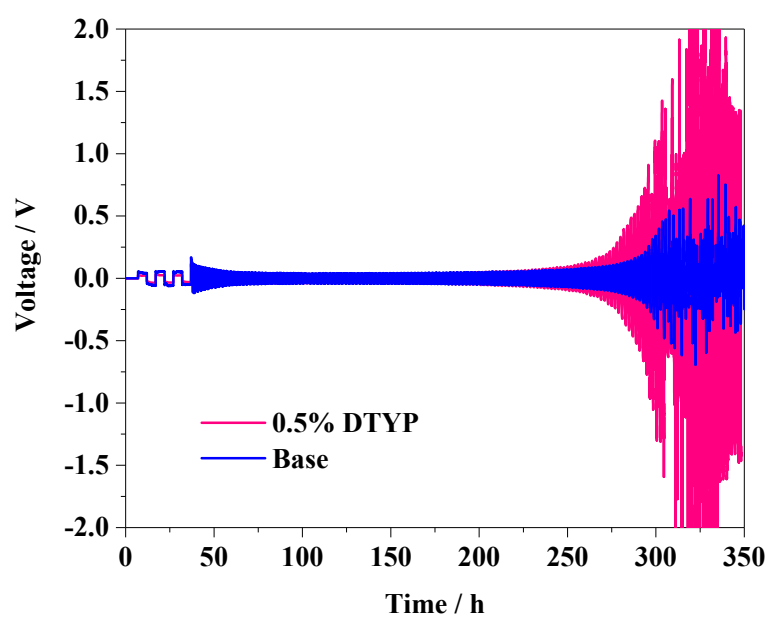

**Fig. S1** Voltage profiles of the Li//Li symmetric cells during the stripping-plating test with a capacity of  $0.7 \text{ mAh cm}^{-2}$  at a current density of  $0.14 \text{ mA cm}^{-2}$  for the initial 3 cycles and at a current density of  $0.7 \text{ mA cm}^{-2}$  for subsequent cycles in base and 0.5% DTYP-containing electrolytes.

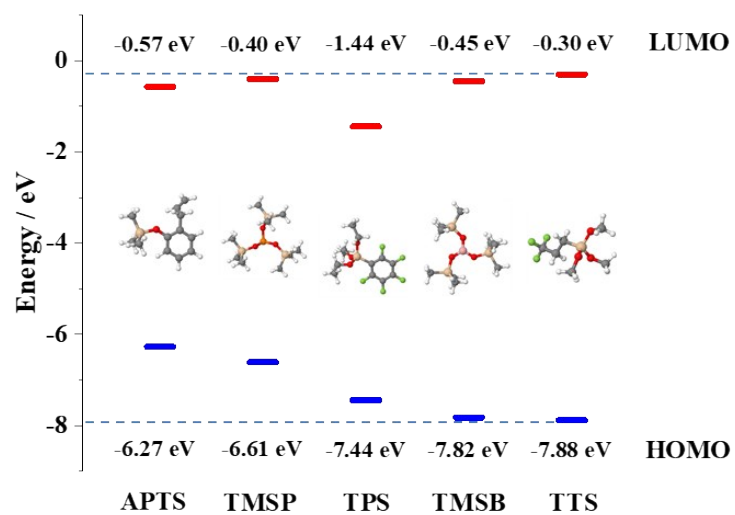

**Fig. S2** Calculated HOMO and LUMO energy levels of APTS, TMSP, TPS, TMSB and TTS molecules.

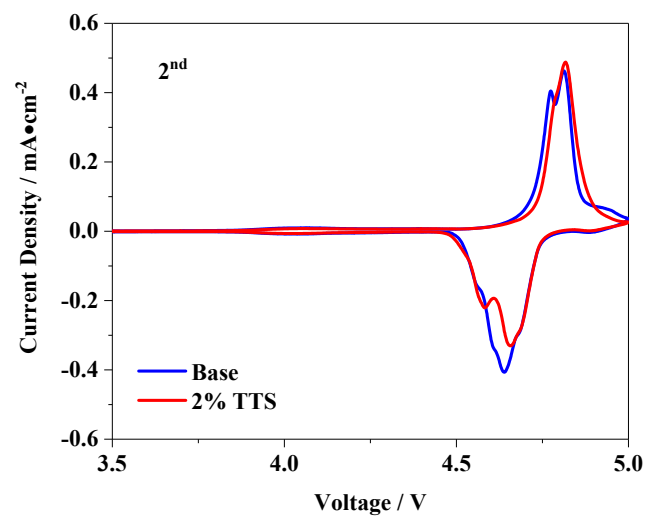

**Fig. S3** Second cyclic voltammograms (CV) curve of H-LNMO/Li cells operated in base and 2% TTS-containing electrolytes at a rate of 0.1 mV s<sup>-1</sup>.

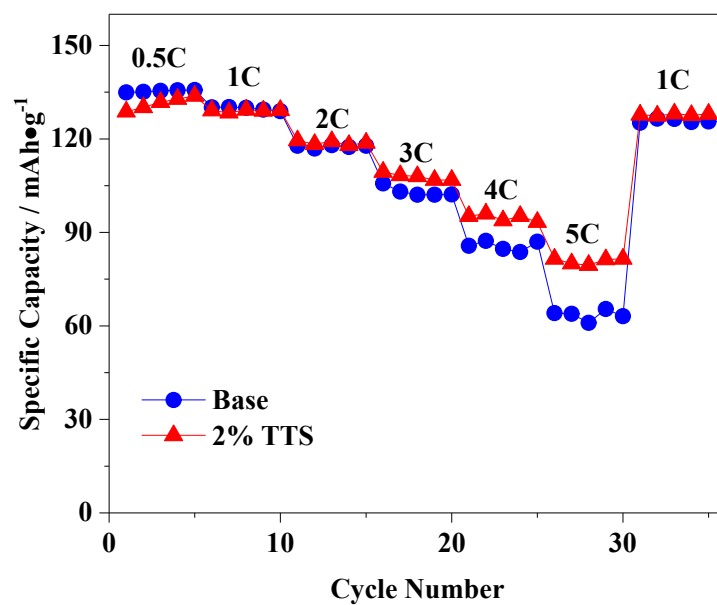

**Fig. S4** Rate capability of H-LNMO/Li cells operated in base and 2% TTS-containing electrolytes in the voltage range of 3.0 - 4.9 V.

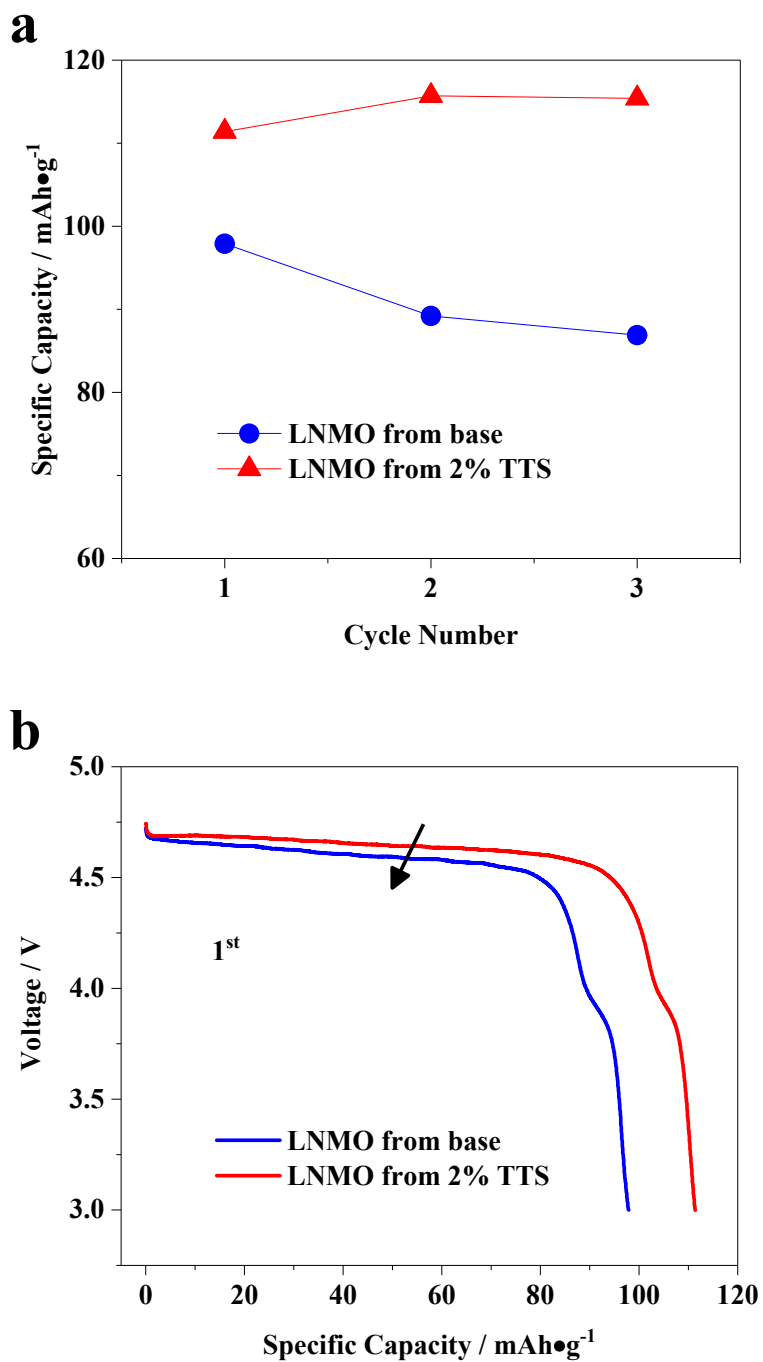

**Fig. S5** (a) Cycling stability of reassembled L-LNMO/Li cells at 1 C within the voltage range of 3.0 - 4.9 V in base electrolyte, and corresponding (b) the first discharge curves. The LNMO electrodes are respectively taken from the L-LNMO/Li cells after 500 cycles in base and 2% TTS-containing electrolyte, matching with fresh Li electrodes to form reassemble L-LNMO/Li cells.

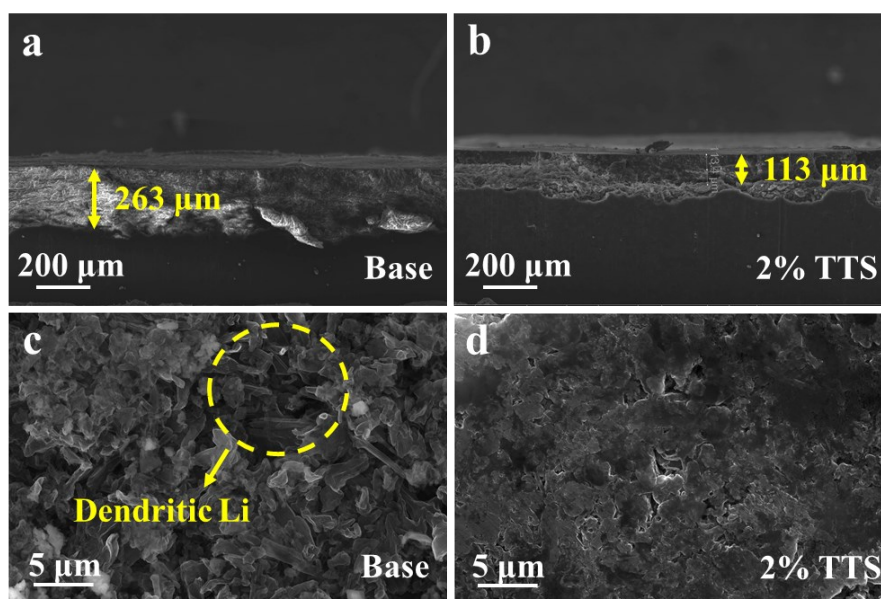

**Fig. S6** Cross-sectional and surface SEM images of Li electrodes from Li//Li symmetric cells after the stripping-plating test for 550 hours in (a, c) base and (b, d) 2% TTS-containing electrolytes.

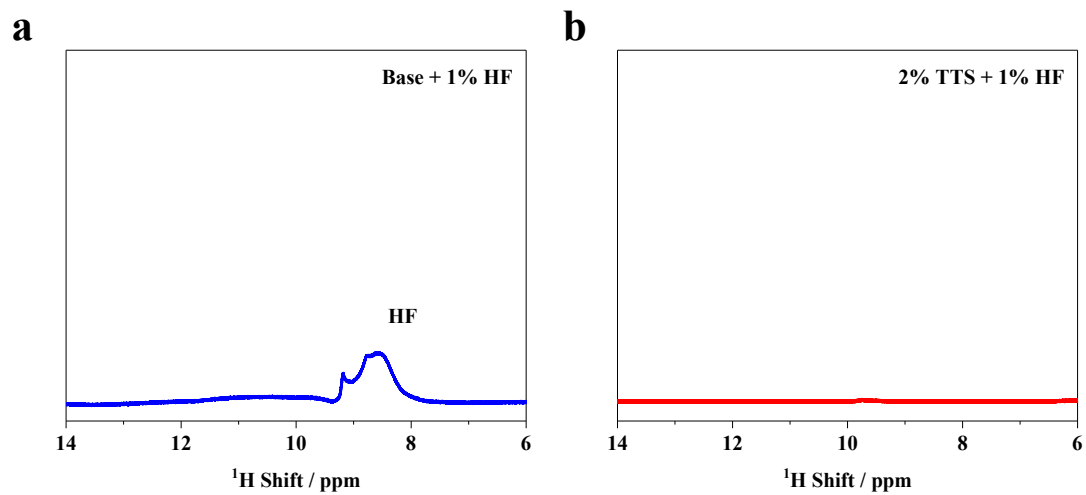

**Fig. S7** <sup>1</sup>H NMR spectra of (a) base and (b) 2% TTS-containing electrolytes after adding 1% HF aqueous solution.



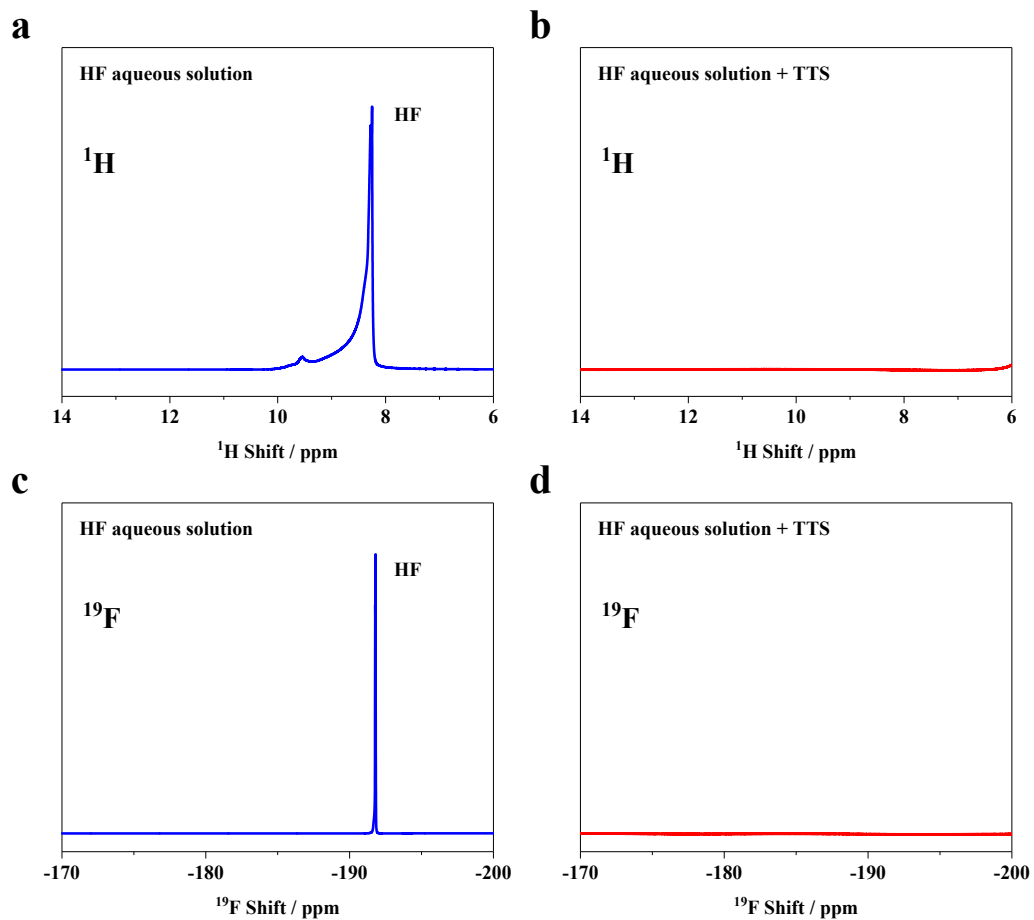

**Fig. S8**  $^1\text{H}$  and  $^{19}\text{F}$  NMR spectra of HF aqueous solution (a, c) before and (b, d) after introducing TTS. The mass ratio of HF aqueous solution to TTS is 1 to 2.

**Table S1** Comparison of electrochemical performance of Li//Li symmetric cell performed by TTS with the other additives.

| Electrolyte additive                                                | Current density / mA<br>cm <sup>-2</sup> | Capacity /<br>mAh cm <sup>-2</sup> | Cycling<br>performance /<br>hours |
|---------------------------------------------------------------------|------------------------------------------|------------------------------------|-----------------------------------|
| 0.2 wt.% P123 <sup>[1]</sup>                                        | 1                                        | 1                                  | 180                               |
| 5 wt.% LiBOB <sup>[2]</sup>                                         | 1                                        | 1                                  | 350                               |
| 10 wt.% FEC <sup>[3]</sup>                                          | 0.75                                     | 1.5                                | 350                               |
| 0.5 wt.% DPS <sup>[4]</sup>                                         | 1                                        | 2                                  | 360                               |
| 0.15 M LiDFP <sup>[5]</sup>                                         | 0.5                                      | 0.5                                | 500                               |
| 0.3 wt.% TAEC <sup>[6]</sup>                                        | 0.5                                      | 0.5                                | 500                               |
| 5 mM C <sub>60</sub> (NO <sub>2</sub> ) <sub>6</sub> <sup>[7]</sup> | 0.5                                      | 0.5                                | 600                               |
| 2 wt.% TTS (this work)                                              | 0.7                                      | 0.7                                | 550                               |

**Table S2** Comparison of improved electrochemical performance of high voltage cathodes by TTS with the other additives.

| Electrolyte additive           | Cathode material                                       | Charging Voltage / V | Cycle number | Current / C | Capacity retention improvement / % |
|--------------------------------|--------------------------------------------------------|----------------------|--------------|-------------|------------------------------------|
| 10 vol.% ADN <sup>[8]</sup>    | LiNi <sub>0.5</sub> Mn <sub>1.5</sub> O <sub>4</sub>   | 5.0                  | 50           | 0.5         | 4                                  |
| 0.075 wt.% Qc <sup>[9]</sup>   | LiNi <sub>0.5</sub> Mn <sub>1.5</sub> O <sub>4</sub>   | 4.9                  | 100          | 1           | 6                                  |
| 0.5 wt.% DMPP <sup>[10]</sup>  | LiNi <sub>0.5</sub> Mn <sub>1.5</sub> O <sub>4</sub>   | 4.95                 | 145          | 1           | 9                                  |
| 0.5 wt.% 4-TB <sup>[11]</sup>  | LiNi <sub>0.5</sub> Mn <sub>1.5</sub> O <sub>4</sub>   | 4.9                  | 300          | 1           | 16                                 |
| 0.25 wt.% 3THP <sup>[12]</sup> | LiNi <sub>0.5</sub> Mn <sub>1.5</sub> O <sub>4</sub>   | 4.9                  | 350          | 1           | 41                                 |
| 1 wt.% PES <sup>[13]</sup>     | LiNi <sub>0.5</sub> Mn <sub>1.5</sub> O <sub>4</sub>   | 4.95                 | 400          | 1           | 41.7                               |
| 2 wt.% TTS (this work)         | H-LiNi <sub>0.5</sub> Mn <sub>1.5</sub> O <sub>4</sub> | 4.9                  | 100          | 1           | 63                                 |
| 2 wt.% TTS (this work)         | L-LiNi <sub>0.5</sub> Mn <sub>1.5</sub> O <sub>4</sub> | 4.9                  | 500          | 1           | 44                                 |

- [1] H. Zheng, Y. Xie, H. Xiang, P. Shi, X. Liang and W. Xu, *Electrochim. Acta*, 2018, **270**, 62-69.
- [2] Q. Zhang, K. Wang, X. Wang, Y. Zhong, M. Liu, X. Liu, K. Xu, W. Fan, L. Yu and W. Li, *ACS Appl. Mater. Interfaces*, 2019, **11**, 20854-20863.
- [3] C. Xu, G. Hernandez, S. Abbrent, L. Kobera, R. Konefal, J. Brus, K. Edström, D. Brandell and J. Mindemark, *ACS Appl. Energy Mater.*, 2019, **2**, 4925-4935
- [4] X. Zhang, Q. Wu, X. Guan, F. Cao, C. Li and J. Xu, *J. Power Sources*, 2020, **452**, 227833.
- [5] P. Shi, L. Zhang, H. Xiang, X. Liang, Y. Sun and W. Xu, *ACS Appl. Mater. Interfaces*, 2018, **10**, 22201-22209.
- [6] Y. Zheng, W. Fang, H. Zheng, Y. Su, X. Liang, C. Chen and H. Xiang, *J. Electrochem. Soc.*, 2019, **166**, A3222-A3227.
- [7] Z. Jiang, Z. Zeng, C. Yang, Z. Han, W. Hu, J. Lu and J. Xie, *Nano Lett.*, 2019, **19**, 8780-8786.
- [8] S. Li, D. Zhao, P. Wang, X. Cui and F. Tang, *Electrochim. Acta*, 2016, **222**, 668-677.
- [9] S. Kim, M. Kim, I. Choi and J. J. Kim, *J. Power Sources*, 2016, **336**, 316-324
- [10] S. Mai, M. Xu, X. Liao, L. Xing and W. Li, *J. Power Sources*, 2015, **273**, 816-822.
- [11] W. Huang, L. Xing, Y. Wang, M. Xu, W. Li, F. Xie and S. Xia, *J. Power Sources*, 2014, **267**, 560-565.
- [12] W. Tu, P. Xia, J. Li, L. Zeng, M. Xu, L. Xing, L. Zhang, L. Yu, W. Fan and W. Li, *Electrochim. Acta*, 2016, **208**, 251-259.

---

[13] B. Li, Y. Wang, W. Tu, Z. Wang, M. Xu, L. Xing and W. Li, *Electrochim. Acta*, 2014, **147**, 636-642.
